# Supplementary material for: Identification of miRNA precursors in the phloem of Cucurbita maxima
Source: PeerJ journal article supplement (doi:10.7717/peerj.8269), 2019-12-11
Supplement: Supplementary_Fig_1.pdf [file Supplementary_Fig_1.pdf]

>P3867

AATCCGTGCAATT CGAAGATAAAAAGGCCATT CATT CAGAACTCACTCAGTCATCGGAAAAAAAAACAGAACAAATTC  
TTCTTCCCTGTTCTTAGTTAATTAGAATGAGAGTTCTGTTTCCAATCACCACCTCATCCAAACCCTCTCTGCTCCTACA  
CAAAATCCTAAGCTCGACTCCTCCCCCTCCCCACC GCCTTCCGCCCCCACCACCACC GCCACCACC GGTTACGAAC  
CCACCTCCGTTCTAGATCTCCGCCGTAGCCCCAGCCCCGTGGCGCCAGATAACCCTCTCTCCTCCGCCGACGACCGTCA  
CAACAACAGCCATCCTCTGGACTGGGATGAACGCACCTCCAGAACCTTGACTGGGAATCCATCATGGGCGATTTGGGC  
GTAAACGATGACTCCAATTCTGCTCTCAAGAACCACC GCCGCCACCACCACCACCACCACCACCACCACCACCACCGACGACA  
ATACCCACGATCATGTTCTCTACTTTTTCCGAATTCCTTCACTCCCAGCCGTTTCGATCAAACCGCCACCTCCTCCCCCTC  
TGATTTCTTCCCTCCGAACCATATTCCAATCACTCCGCCCCCATGCTCCACCAGACCTTCGATTTCCGCCCAATTC  
AACGACCCATCTCTCCATTTCTCGAAGATCTCGTCGACGCCGCCGATTGCTTCGATTTCCAATGATTTCCACCTCGCTC  
ACGTCATACTAGAGCGCTCAATCACC GCCTTCAATCCGCCTCTCCGCCAAACCTCTTACC GGCCGCCTTCTTCTT  
CAAAGAAGCTCTTCAATCTCTCTCTCCACCTCCGCCACC GCCCATAACTCCTCCTCTCTGCCCCGACATCGTCCAT  
ACTATTAAGGCCATAAAGCCCTTCTCTGCAATTTCTCCGATTTCCCTGTTTTCCACTTACCACCAATCAAATCCTTC  
TCGAAGCTCTCAACGCTTCTCTTTTATTATATAATTGATTTGCACATCGGATTTGGTGGGCAATACGCCTCTTTTAT  
GAAGGATAGCTGATAAAGCAGAATCAAGAAACGTTGTTCCGCCAGTATTGCAATACC GCCGCTCGTGTGTTGAGGAA  
TTTGCGGTGGAGTCCGTTGACTAGAGAGAATCTCTGCCAGTTTGCCCAAGATTTGAAGCTCCGATTTTATATTGATC  
TTGTGCCGCTTACAGACTTTCAAGACGTTATCTTTCAAATCCGTTGAAATTCATGGAAGGGGAGAAGGTGGCGATTCTGTT  
AACTCCGACCATCTTCCGCCGTTCTCGGGAGTTCTAATGGCATAGCCTCTTTTCTCGCCGACGTGCGATTAGTGTCTCCG  
TGCGTCTGCTGTTTGTGATTTTCAAGGGTGGTCCGACTCCGCCAAGGCGTCTTCAAGAGGAATTTGTTGGATAGTC  
TGGAGTTTTACGCCATGATGCTCGAGTCTGGACGCCGAGGGGCCGACGGCGAGTGGGTGCGCGGATTGAGACGTT  
TGTTCTTCCGCCGAAGATCTTGGCGCGGTGCAAGGAGCGGGGAGAATGGCGGTGCCGCCGTTGGAGGGAGGTGTTCCAC  
TCGGTCCGGATGAGGCCGTTGGCGCTGAGTCACTTTGCTGATTTTCAAGCGGAATGCTTACTTGGCAAAGTACAGGTCC  
GAGGGTTCCAAGTTGGCAAACGGCATGCTGAGCTGGTGTGTTGCTGGCATGAGAGACCTCTGGTCCACAGTCCGCGTG  
GAGGTATTAGCTGTTAAGAAGTTGAGCTCGTAAAATTTGATAACTACAAATCATGAGTAAAATTAACAATCAAATTTCAA  
GAACATAACTCAAAAATTTTAAAATTTTGAATTTATATAAATTTGGGTGGGGACTAAATTTGTAATTTACCTTCTTTTTAT  
TTAGAATTTAATTTTCCAATGTTATATTTACC GTTTTTCTTTTAACTGTTGTAAAAACAATGTTATCTGAACACTTT  
TTGGATAAAAA

>P7902

CGTGTCTCATCGTCTTCGATTCTGGTTGCTATAAAGGCCCTGAACCGGCCATGGTTCTTCTCGCTCTGCATAGGGCT  
TAATCTCCGTAGTCTCTCTGTTTGCCTCTCATTTCCGTATCCTTAATCTTTCCGCGGCAATATCTCGGCCTTGTCTT  
CTCAGTTATACACCGGCCTGCTCTAATTCGCTTGGTGCAGGTCCGGAACTGCTTCGCTCCGGTTTGGCTTTGCCGACGG  
CCGGCATCTCCTAATCTTCTTTTTCTGTTTTCTCTGCTTCTATTTTTTACTTTTTTGCTTCAATTTCTTTGCCGCGTG  
TGGTTTAGCTTGTTCGGAAATGTTTGGGCAATTTGATCCCGCTTGCATCAACTGAATCGGAAACCGTGGTGAAGAT  
TGCTTGGATTCTTACCCTTCTACAGATCTCAGGTACGGAGTTTCTCTTACTTTTCGAGAGAGAACGAGTTAATTTAATTG  
TTCGCATTTTTTTCATGATTGGAGTTGTAGAATTTGTTGCTAGTTTTCGATTTCTCTCCATGACTGAAATTAATAACCGG  
TTTGAATAATACATAATAGATCTGGTCTGTGCTCTGAATCTTATTTAATTATCTTTCTTCTTGTGCTCCGCTTTCCG  
AGTTAACTACTGAAGAGCTTTAGCTGTGTTTCCGATTTGAGGCTGATGTTTGTATATCATAGAGCTAGAGTTATTGTCGT  
TGAAGTTATTTGGTTTCTGTTTATTGCTTCCATCCATGAAACACAATGACAGATGTTACATCTAATTTTGGACATAAAA  
CTCCGATTTCAATCCGTATGGAATAACGGAACGTTTGAACCTTTGTGTATCATAGATCCAGATTTATTATCGTTGAAGG  
TATTTGGTTTTAGTTTATTGCTTCCATCCATGGAACACAATGAGAGATGCTACTTCTAATTTTGCATAAAAACCTTCGAT  
TCGAATCCGTATAGAATAACGGAACGTTTGAACATTTACTTTCATATTCTACTCCTGCTAAAAAATCAAAGGTCAAAG  
AAAAAAGAAAGAAAGGAAAGAGAGAGATGACAATAATCTTTGAACCTGCTGTTTACCTTGAATAGTGTGTTGGTCCAA  
TTAATTTGATCTGTTTGTCTGAGTACATTTTCCGCAATAATGAGTTTGCACAAAAGAAAGAAAGAAAGTGGCGACCTGTTT  
GTAAGTTGTAATCTTCTGGTAATCTTGTATGACTGTAGAATTTCCCGCAAACAGGTTTCTGAAATTTTGTGTTTCTT  
TCGTTTGCATAGTGCAGAGTAGAACTAGAACAATGAACTTTGATTTCCGAAAAAGGGGGGATTTGTTTTCATTTGTGCG  
CTCCTGGGCCGCTCGGCTCCATCATTCCATGATAATAGCCTGTGAAATGGAGACATTTCCGATTTCTTTGTTCCGAAA  
TTAAGTATAAGTGAACGATTGTGTTCCATTGTAATAGGAAATAGCCAGTAGGTTTTGTGGTTGGTAGGTGTTTACCA  
TAAAAGC

>P10713

TAAAGGAATCTACAAAGAATTTTAGTCAAATTCACAAGTCTGTA AAACTCATT TTTGAAGTCCAATTTTAGTTTAGGT  
TTATAAAATTTATGGAGAAAAGTGAATTACAAAACAAACAAACAAACAAAGAGTTACAACACTTCTTGCATAAAA  
GTGGTAGTTTAAAGGGGAAAACGTACTTGAGATGCAGAAGCCTTGCCGAAAAGTTTGAGATGGGAGCGGCGGAGGGCG  
GGGGGTTTTAATAATAGAAGGGATTAGTAGCTAAAGGAGGCATCCGAAGGGATAGCATGATCCAAAATTTACGTAGAAGA  
AATTGAAGGATATAGATAAGTTGGGATCAATGCGATCCCTTTGGATGCTTCTTTAGTTCCACACAATAGCCTTTTCATC  
TTCTTTTCATCTCCATCTCTA ACTCGGTTCTTAGGGGAACACTTCAATATAAAAAGACCCACTTTAGTGCTTAACCAAC  
CTTCCCTCCCCCTTTTATTCAATTTTTTTTTTATTATTATTATTCTCTCCCTTTTAAATATAACTAAACTTATTCTAATC  
CTTTAATAAGTATAAAAAAATAAATATATCAATACTTAACTTTATTTTATTAATTTTAACTACCTTTAAAGAGTTTTAT  
TAGCGTGCACGTTAGTGAAAATTAAGTGAGAGTGTA AAAATTTACTACCCTTATTTAAGATATTGACATTAATTTATAT  
ATATGGTCAGAAATTAATAAATCTTGGAAAAGAAAAGAAAAGAGAATAGATTTTGGGTTTCCCTTTTTGTGTAC  
AAGGTGTTGGTGAATTTAATGGGTTTGA AAAACATTTCAATTTTGGGAAAATTAAGTTTCGTTATTCCCAATGCACTC  
AACCCGTTTGTATTTTTTTCCAGAGAAGGAAGAACAGGAAGAGAAGAGGAATGGCATGAATAGGCAATGGAATTTGTG  
TTATAATCCATGTGATTATGTTTATTACGTTGAGCCAAAAAAACCCAAAACCCATTTCAATGTAGTATCTTATGGAA

CACACATAGTTGTAAGTCTCATTATTGTTAACAAATGAATGTTTTGTTTGTGTGATGCAGGGCATTGAGGCTTAGTTGT  
GCAGATGGGCATTAATAGTGGAAATTTATTTTAAAACTTTTTGAGTAGAGAAAAGAAAGTGACAAAAATGGTGGTGTGA  
TGGGTTTTTAAAACTTCTCCATAATGCACAATGGTGGGTACCTTATAAATGGTGCACATGGAAAGACGATGATGATG  
ATGATGTATGGTGCTAGATTTTGTCCAC

>P19669

TTAGATGAGGGTAGAAAAGTGGAGTCCATGTCACAATGCCCATACCCAACAAAAGCCTTTCTTATTACGTATAAAAAGGA  
CCCCATGAAAGTTAAAAATAATGCATGGCCAAATCAAATCTCAATCAAACCCCTTCTCTCTTTCTTTCTTTCTTTCTTT  
TCGTTCCATCTTTTACTTCTTTTCTCTCTCTCTCTCTCTTTATGAACAGTTGAGGGGAATGTTGTCTGGTGCAGT  
ATCTTTTCATCCTTTGAATTTGAAACAATCAAACCTTTTAAAGTTTTGAATGATTTGCGACCAGGCTTCATTCCCCTCAA  
CACACCCCATTAATCTTTCACTTTTTTCTTCTCAGTTGGGTGGCCTCGGCAAGCCTCTGCTGCCGTCATACAGGTATGC  
TGGTTATATACTTATGCAGGAGGTCTGTGAAGGCTGTCTAATTCACCCAAGTTTTTCATGGCTGTTTTACTGTGTGTTT  
TTTGATTGTGTCGGGAAGTTTATTTGAAAGAAATAAGGTGGAATCTACTGCTGTTTTCTTTGTTCTTCTGTTGTGCTTAT  
ATCCAAGATGAAGTTTTGTTCTTGTGAGAACTTTCCCTCCAGCCCAAACCTATAATTGTAGCTACACAATAGAATAA  
GAGGGGAGGGGAAGGGATTCCAACCTCCAGTCAATTTTTGTTCTGTTAGAAATGATTTGGAAGATGTAACCCGAAGGGAGT  
AGCTGTCAAGAAGCGTACTGTAGTGTGCTTGGATTTTTGTTCTAACGGGTGCCACTTTGGTTCATTCATCTTACAATTGA  
TATAGCTGATATGACGGAAGAATATCAAATCATTACTAAACTAGAGAAACC

>P20012

CCCTTTTCTCATCTTCTGGGATTCATGATCAGTTTCTTCTCATCTTCGTATCATTATATTCTTTAAAGGGTCTCTTTTT  
CTCTCTGATTTTTAGGGTTTTTTCGGTTGTTGGCGTGATCGGATTTGATGTTTTGTGAGGGTTAAGAGAGCTTTCTTCAG  
TCCACTCATGGGTGGCGGTAGGGTTAATTAGCTGCCGACTCATTGCTTCAAATACTGAGTCAAAAACCCGACTCTCCG  
ATTCAGTAAACGAATGAATGATGCGGGAGACAAATGAATCTTAAGCTTCTGTACTGGACTGAAGGGAGCTCCCTTT  
TCTTTTACCCTTTTGATTTTATCCGTTTTTTTTTTTATCGAAATCTTCGTTTTATCCGTTAAACGATCGAAGACCCAA  
TTTTATAATTACGGTATTATGTTGAAAAGATGTTAAAAATCTCGTCTTTTTTATGGTTTTTACCAGCATTGATGGTCTG  
CTTGGAGTCAGATTTGAGTAGGAATTACCCATTTGAAGAAAAGTTTTGAGGTAAGATAAGTTAAGGTTGATTCAATTATG  
GGTTAATGGGTGGATTAGGGTTCTTGAATAATGAAGGAATATTTTTTACAGAGCAGTAAAAAAAAGGGTTTTTGTCTGG  
ACAGACACGAGCTTCGATGCCATAGCTTCTTGGGTATTGGCCATATTGCTGCAACAAGTCCCAGACATTTTATGTTAC  
CACCACCTCTTCCATCTTGGGTATCGGTCTTAATGTTTTGTTTTGTTTTGTTTTGTTCTCTCTTTGTCTGTG  
GTTAGTTTTCTTTTTTGTGTTGTTAAGGTGGATTTAAG

>P20793

TCTCTCTCTCTCTCTTCTCAGATGACTTGGGTTAATTTAAGCCGTTTCTTGTGGTTTTAATTGATGGATTTGTTGGTG  
GGTTTCAATATTTTGAATTAGATTGTACAAAGGAATGAAGTTAATTTATTAGCTTATATGGAGTAAATTAAGATGTGGG  
TTTTATAAGTATTGTATTGTGTTTATGTGCAGAAAAAGAGGAGCTCTTTCAGTTCATCCCAGACAGTAGAGGCT  
CAAAAGGTTGCTGCTCATTGCTTAGTTCAATAGCTCAATATACTCAAAATTTCCACCGTTGAGATGCCGAAGCTGTGAG  
ATGAGCTCCTGATCTAACGATGGAGGAGCGGTCTTTGATCATCACTGTCATGTATTGGACTGAAGGGAGCTCCTCCTTA  
ATTTACTTTTACACGCATACTACAATAACTCATCTTTGTGCGAGAATGATTCAGTAAGTAATAGTTAAAAAGCTTGT  
TTTTTTTTAACTTTTTACAATGACCCTTAATTTGTGTAGGAATATCTGTCTGTTAAATTTGTGTGGTTTATAGAGATTT  
GAAGAGAGCAGAAGCAGTTAAGGAGGGTAGCTTTCTCAGGGTCCAAAGCTTTGGGCGATGTGTGCAACTTTGTGAATC  
TTCCTTTTAACTAATTTCTCTTTGTGGTCTTACTATCATTATTTTTTTTTTTCTTTTTAATTCAAATATTGTTGAAAT  
AAATAATAATTTAAATTTTATTTGTTTAGCTATAAACATTAATATACTTTATGCATTAATAATTTAAATTTAGATGTGA  
AAATGAA

>P21134

CCCTTTCTTTTCACTTCAACCCCTTTTCTCTTATGAATTTTCTTTTCTTCAACCCATATCTAATGGCTCGTCAT  
CTACCTCTAGGGTTTCTAACCCACATGGGCTTTGTTCTTCTGATCTAAACTGGGTTTTTGTCTTCTTTTCTGGGTTT  
TTCTTGGATTTTTGATTGATTGAGTGTGTTGTTTAAAAATTAATCTTTTTGGGATTAGGGTTACAGGCAGAGCTCCTT  
GAAGTCCAATAGAGGTTGTGCTAGGTTGATCGAGCTGCTGAGCTATGAATCCCTCAGCCCTATCCCTATCTCATCAA  
TCATATCTAAAGCTGATAGGCCTGTGGCTTGCATATCTCAGGAGCTTCATCAACTGCTTTTGTAAATCCTTGTGTTGGA  
TTGAAGGGAGCTCTACATATTCTCTCTAATCATCTTGTATTACCTTTTCTTATGCCCTAATCTTCAATTGACTTGAGTT  
TCTTGTTCCTATTATTTGTTATGATTTGATGAAGTCTGTGATTTTTGCAGGGGATGGAATGGTTTCAATTGTTGGATCT  
TGCTTAGATTGATGGATCTTTTAGAACATGTTGTGAAGAGATGAATGCTTTTTGTAGTGTGGAGGTACAGATGTTG  
CTTTGTAATATAGCCATTTTTCAGGTTCTTGGAGATTTGCTAATGGAACCCCTTTGTTGTTTATTAAGCAATCATTACAGATC  
CTTTAGCTTTTGGCTATTGAGTATTGATGAATAGTAATGGCAACGATGAACTATAATCTATCCTATTTTCTCG

>P29987

CTCACTCCTCTCCTCCAGTCTCCGCCTTCTCTCTAGGGTTCGATACCCATAATTTTTCTTTTCTTCTGTTCTTCAGAAATG  
GCTCTGTTTTGATTTCTCCACAGCTTTCTTGAACGCTCTTCTCTGAGCCAAATTCGCTCCTCTCTCTCTCTCTCTCTCT  
TCAAAGCGTTCTTTGTTCAATTAACCTTTTGGGTTCAATAAAGCTGTGGGAAGATACAGACAAGGTCAACCAATCGGTA  
ATCCACAGCGAAATTCGCCGCTACAATGACCTTCAATCGCCGGCGCGCTCGGTATATTTCTGTAACCTACAAAATCGT  
ATGATGTAATTTCCCTTTCTTAAGCTGTTTTGTGCGTGTGTTGTTGTTGTTTCTTAATTTGCCTTTTCAGAAACG  
GTAACTTTTAGGTCAATTTCTCCCTGAATTTACTCGGAAATGTGAGGTTTTCAATTCGATTTGATTTAATACCTAATCT  
TCTCCGTTGATAGCAGAAACTATCTTGAATGGATTCAAG







>L25150

AAAAAGTGTTCAGGCAACATTTTTTTGGGTCGATTGCAAGGCTAGATCTTCGGTTTGTGTGTCGGGTGCCCGATCCTC  
CTCCATCAACAAAAAGCTGCAAACTTTGGCTCTCTTTTTGCCCTAATTTTTGTGCGTGCCTTACGACAGTTCAAGCTG  
CCAGCATGATCTAACCTTAATCTCTCCTAATTTTCGATTTTCTGAGGTTCAAGATTAGATCATATGGCAGTTTCACCT  
GTTGCTGGCTCCACGAAGAATTCAGCCCTAAATTCAAAGTCTTGACTATATCAGCCGTTTTCTATCCATAATCCTTAA  
AAAAGTGTTCAGGCAACATTTTTTTGGGTCGATTGCAAGGCTAGATCTTCGGTTTGTGTGTCGGGTGGGACGATAAGG  
TAATTGTCTCTTTGATTCGTTTCGAGTTATAAAAAAGTTGAATGTAAAACCTTTCTTTTCATATAAAAGGTTTTTATATC  
TCTGTGTATGTATTCATATTTATAATGCCGATCGAAAGGCTTGAATCGATAAATACTCCGGGTGGTTTATGATTGATG  
GGTTTTTCTCATTGCTTATAGTGAGTTATTGTTTTTTTTTCTAAGCCAATTCATCCAAGAATGCTATATCTTATCTT  
TGTTAGAACCCGATAAGATTAGAGTTTAGAGTTTGAATAATTCGACCTTTTCGAAAATTTAAGGTTGTTGTGTATTATG  
AAAAATGTAAGGTTGTGTATTATTTCGGACTTTAATTTGAAAAATTT

>L25833

TAATCCCATTAAGATGAAGTATTTCGAATCACAGTCCCACAGGAGCTTTTAAGATGATGATATATAAGATGGAAAACCTTA  
TATATAACAATACAATACATTTTAGAAAAGAAATGATTTCTAAAAAGTTGAAAGCAATAAGCATGGAGAAGGGGAATCTGG  
AAAGCACCAAAGCCAAAACCTTTTGGATAAGAGAAAATTCGAGACTCAAAACCCCAACAGTAACCAAAGCTGAAGATCA  
ATCTCCATTGCTCTCGCCCTAACTCTTCTACGACTAAATTTATAAATTAACCAACCTGCAACACAAGAGAATGAAGA  
AGTGTGTTTTTTTTGGTATACAGGAATTGGATGAAGCACACAGCAACAAGAAATGAAAATAGGGGGGTGGGGTTCAATG  
ATGGGGAGAAGAAGGGGATTGGAATATTCGTGATACCAACAAAAGGTGAAGCTACCATATGATCTGATCTTTCTTTGT  
GTGAAGAGCAAGAAGAAGTTTAGATCATGCTGGCAGCTTCAACTGCTGGTGATGCACGGCAGAGTAAGAGAGTTTTGTGT  
TGTAAGTAAATTTGAAGGAAGAGGAGGGCAATAGGTAAGGGGATATAAATAGAGTTTGTGCTGTTGATTATTATGTGATT  
GCAAGGTTTTGAAGAAAATGAGATGGCAGAGTGGCAGTGGTCCAAAGGTAAGACAAAATTTGAATATTATGAAGCCCCAC  
GCCATTACCC

>L31431

AATTGAATGATATTTATTTATTTATTTATTTAATGAAGCTAATCTAAAGGAGTGGTGCATAGGTGGTTCGACCTTATCAAAT  
ATGGATGCAAAACCCATTGAAAATGACAAGCATGTGACACAACCAAAACACACAAAAAAACCAAAACAATATGACGTAAT  
AAAACACAATAATTACGTACCGATATAAAAATAATAAAGGATAAATCTTCATATCTCCCCACCCGAAGTGATTTTGTGCT  
GCTGCTGCTGCTGCTGGCGCCACTCGCAGCTTCCATGGGCCCTGCAGAAGAAGAAGAGAACCAAGGTAGCCAAGGAC  
GACTTGCCGCCGCGCCACATTGACGGCGGCGGCGAGTTGACCCGCGCGCAAGTCATCTGGGCTGCATTCACCTCCC  
TCCTCCTTTGGGAAGGCAGTGAAGCAACCCAAAAAACACCATAAACACGTGGTTGGGTTGGGTTTGGGGTTGGGGT  
GTGGGTTTAGGGTGGAGGAT

**Supplementary Fig. S1.** Sequences of transcriptome contigs identified as abundant in the phloem and leaf transcriptomes (Table 1). pre-miRNA regions are shaded, mature miRNA sequences are underlined.
